# Supplementary material for: Graphene-based iron single-atom catalysts for electrocatalytic nitric oxide reduction: a first-principles study
Source: Royal Society of Chemistry journal article supplement (doi:10.1039/d4nr00028e), 2024-01-01
Supplement: d4nr00028e1.pdf [file d4nr00028e1.pdf]

*Supporting information for*

**Graphene-based iron single-atom catalyst for electrocatalytic nitric oxide reduction: a first-principles study**

Haobo Li<sup>1</sup>, Donghai Wu<sup>1,2</sup>, Jiarui Wu<sup>1</sup>, Wenjing Lv<sup>1</sup>, Zhiyao Duan<sup>3\*</sup>, Dongwei Ma<sup>1\*</sup>

<sup>1</sup>*Key Laboratory for Special Functional Materials of Ministry of Education, and School of Materials Science and Engineering, Henan University, Kaifeng 475004, China*

<sup>2</sup>*Henan Key Laboratory of Nanocomposites and Applications, Institute of Nanostructured Functional Materials, Huanghe Science and Technology College, Zhengzhou 450006, China*

<sup>3</sup>*State Key Laboratory of Solidification Processing, School of Materials Science and Engineering, Northwestern Polytechnical University, Xi'an 710072, China*

---

\*Corresponding author. E-mail: zhiyao.duan@nwpu.edu.cn (Z. Duan).

\*Corresponding author. E-mail: dwmachina@126.com (D. Ma).

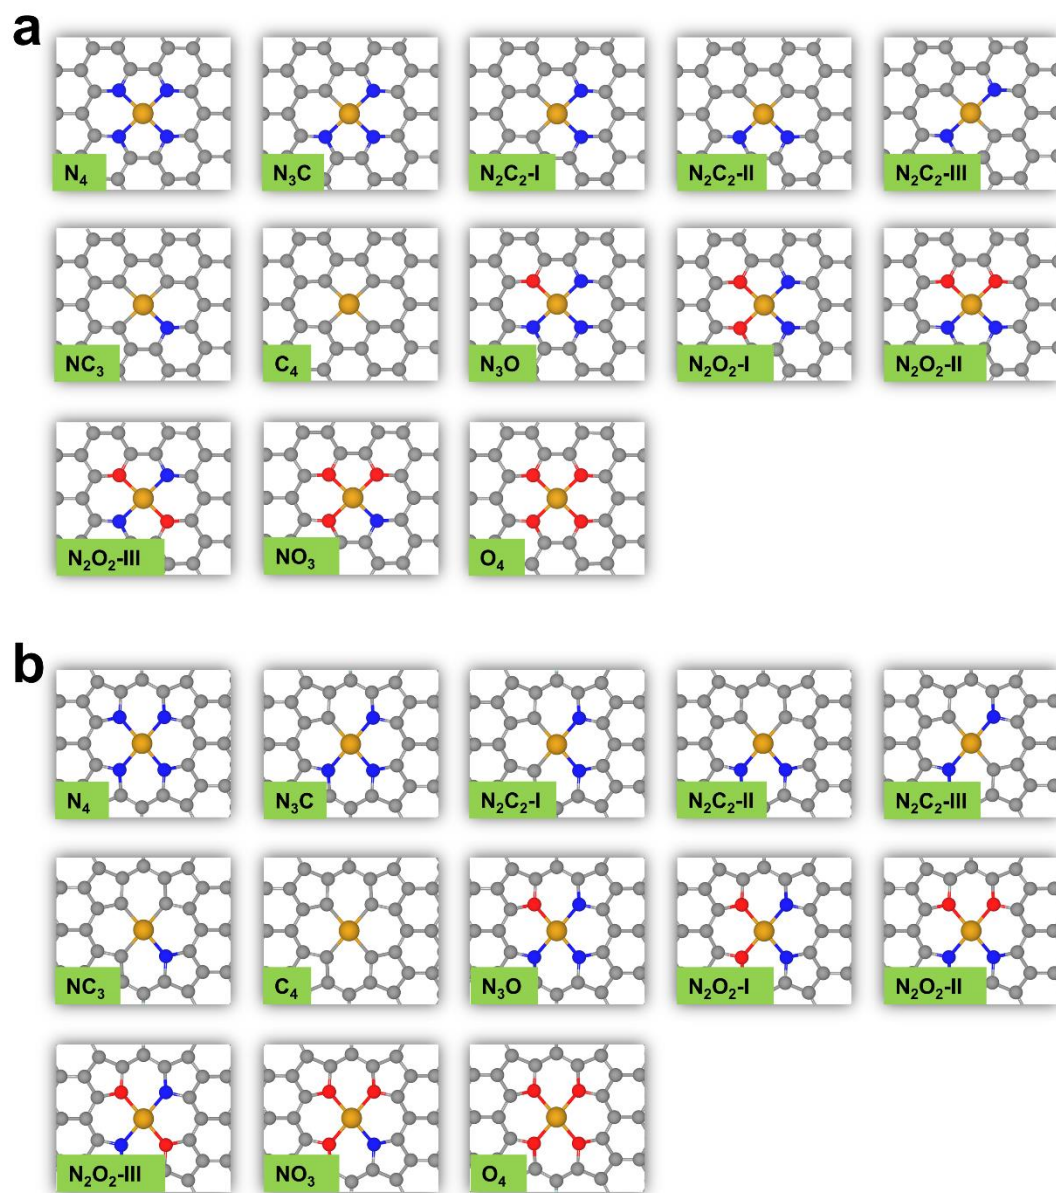

**Fig. S1.** Optimized atomic structures of the PD-Fe-SACs (a) and PR-Fe-SACs (b).

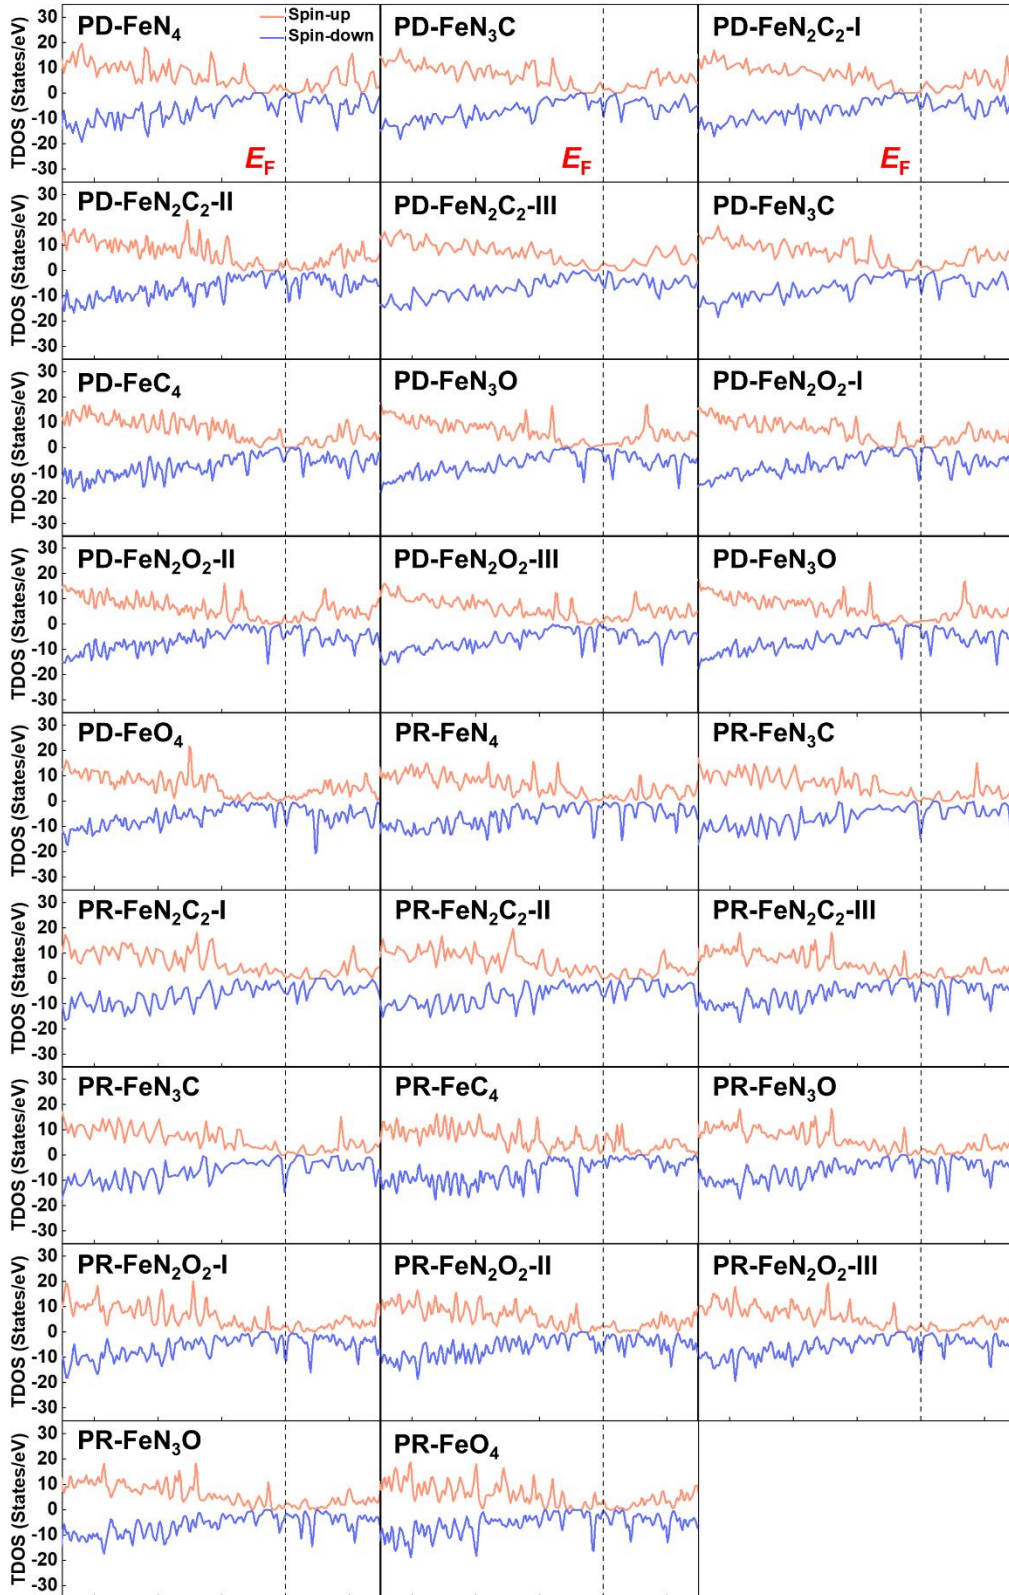

**Fig. S2.** Calculated total density of states (TDOS) of the PD-Fe-SACs and PR-Fe-SACs. The Fermi level ( $E_F$ ) is set to 0 eV.

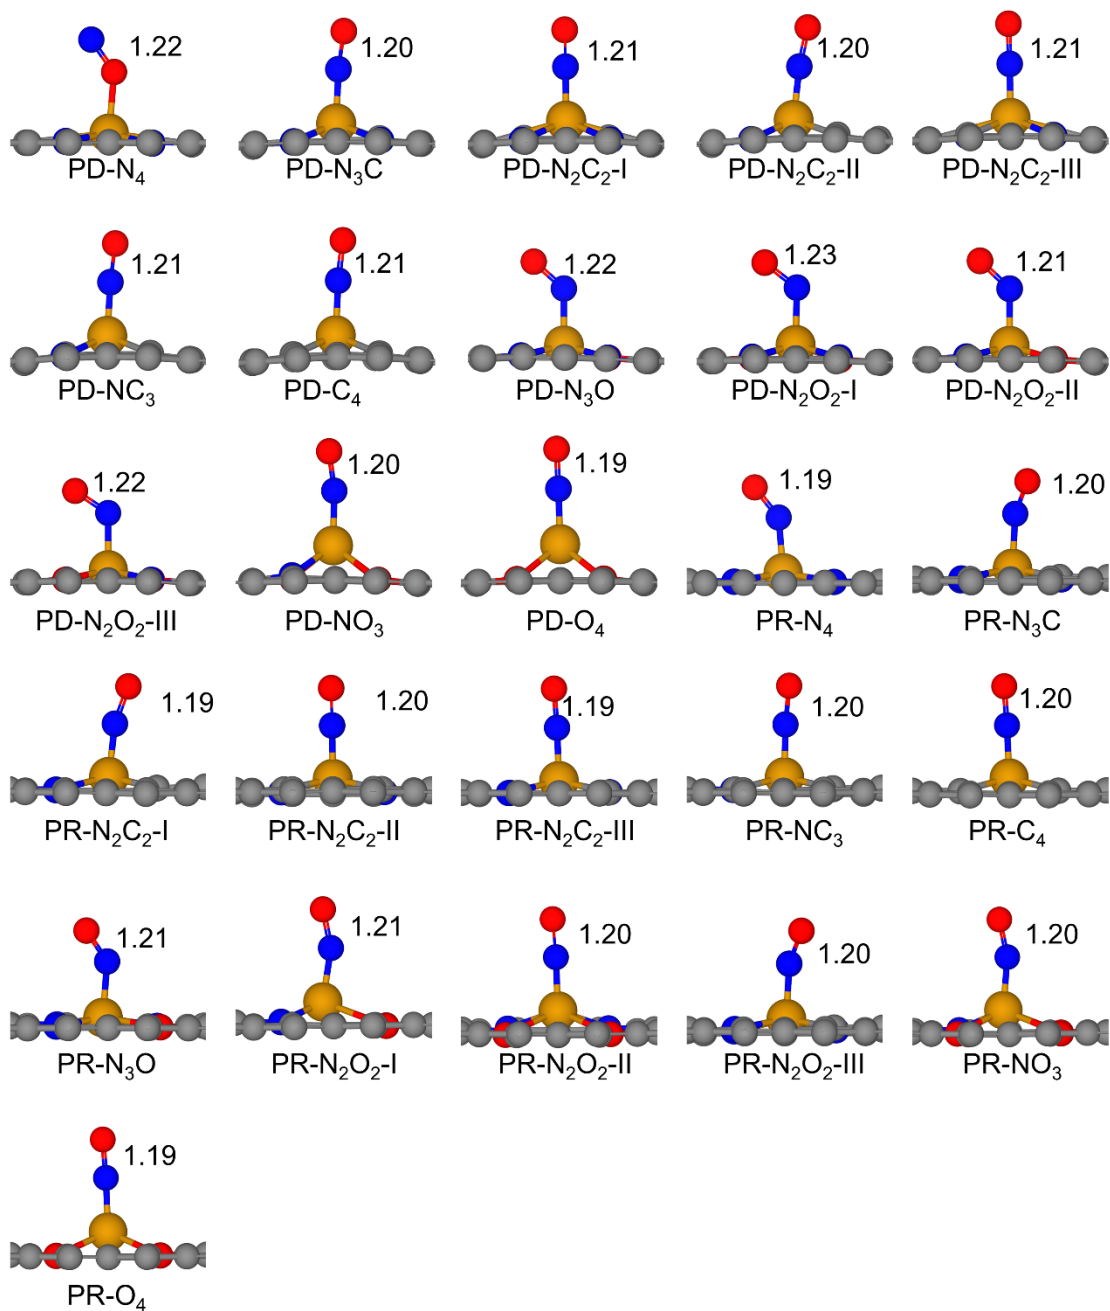

**Fig. S3.** The most stable configurations and corresponding bond length (in Å) of NO adsorption on the PD-Fe-SACs and PR-Fe-SACs.

**a**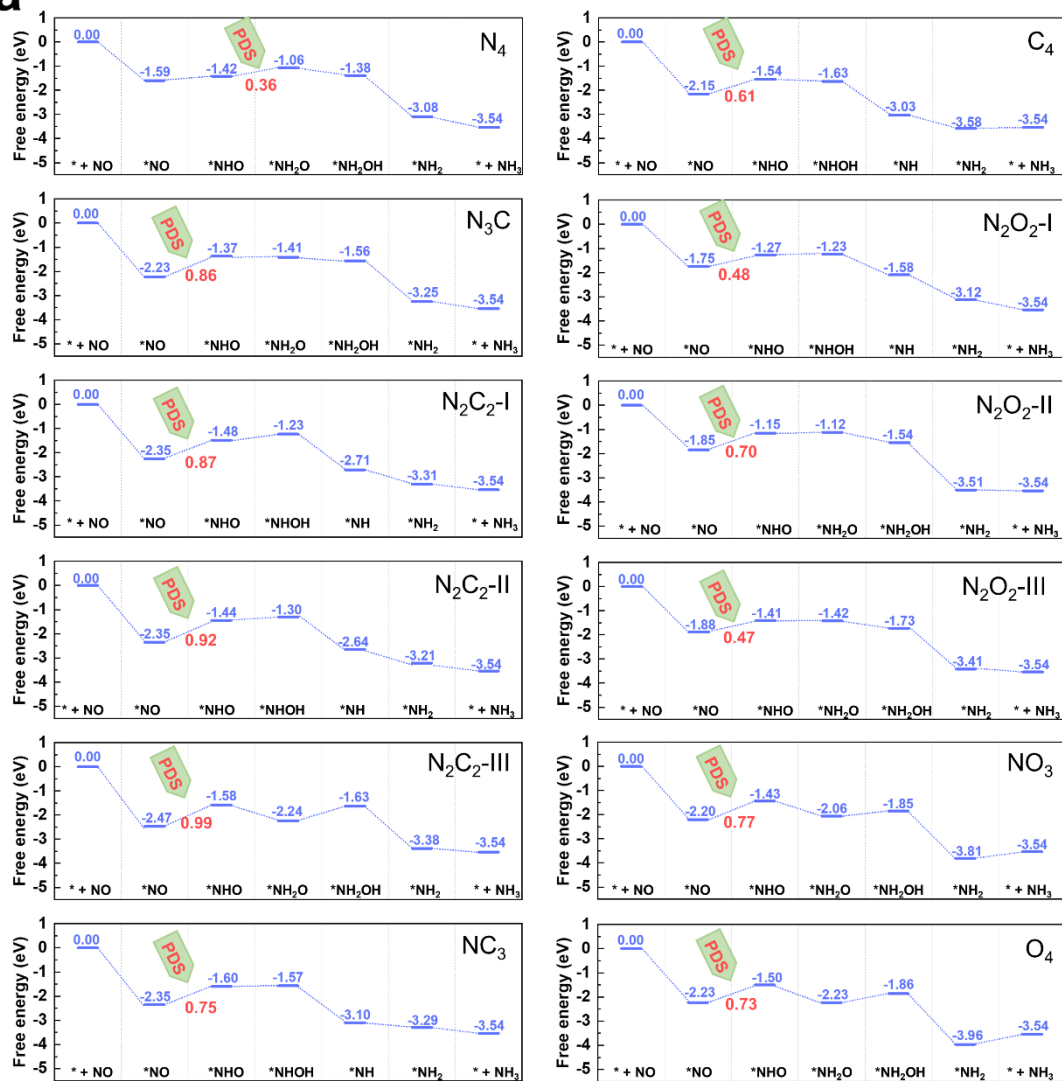

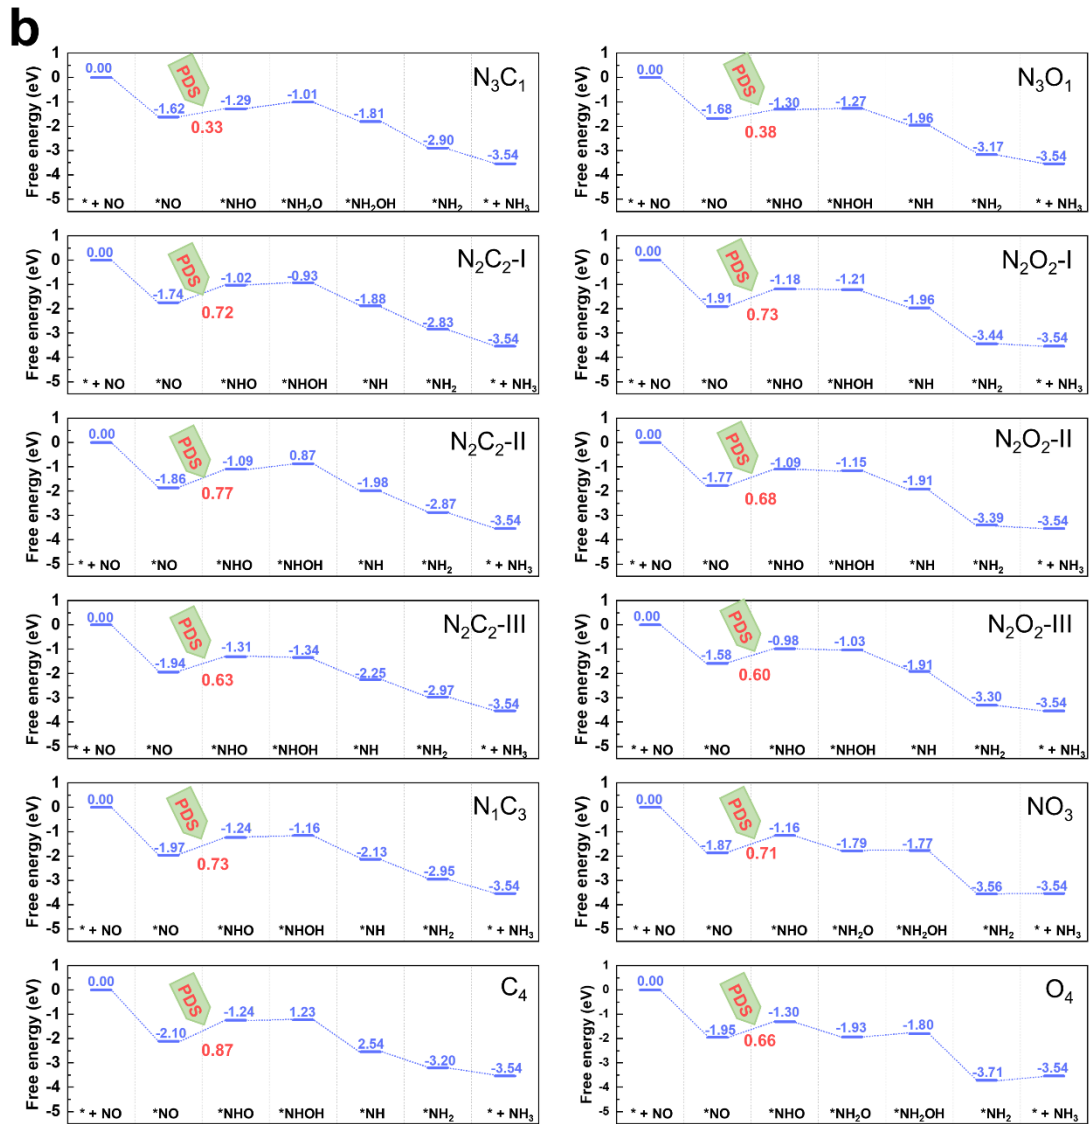

**Fig. S4.** NORR free energy diagram through the most favorable pathway for PD-Fe-SACs (a) and PR-Fe-SACs (b).

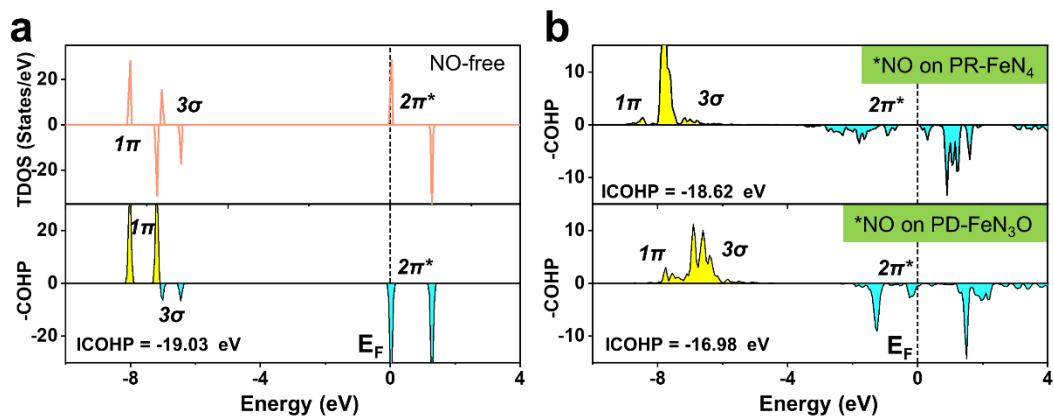

**Fig. S5.** (a) TDOS and corresponding COHP of free NO molecule. (b) COHP of \*NO on PR-FeN<sub>4</sub> (up) and PD-FeN<sub>3</sub>O (down) SACs. The Fermi level ( $E_F$ ) is set to 0 eV.

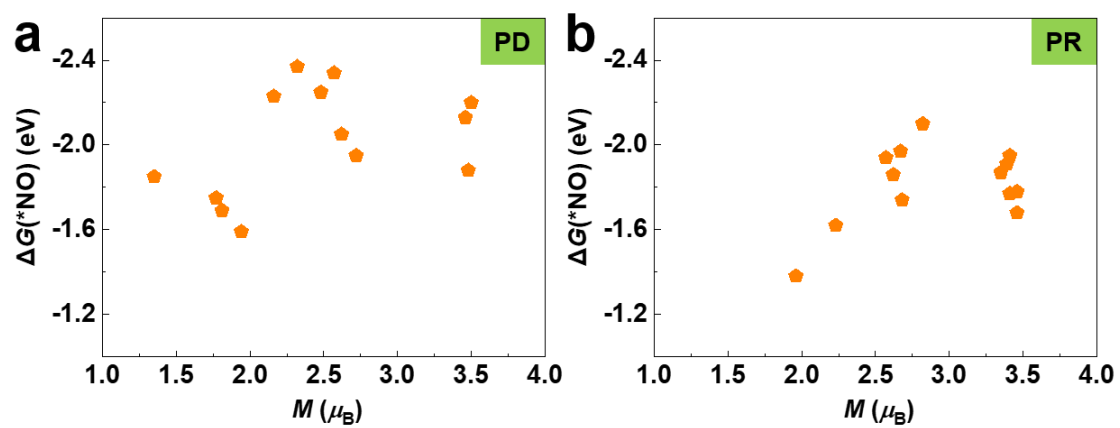

**Fig. S6.** The correlation between NO adsorption free energy ( $\Delta G(*NO)$ ) and magnetic moment ( $M$ ) of the Fe active center for the PD-Fe-SACs (a) and PR-Fe-SACs (b).



**Table S1.** Calculated zero-point energy ( $E_{ZPE}$ , in eV) and the product of temperature ( $T = 298.15$  K) and entropy ( $S$ ) ( $TS$ , in eV) of various species involved in the reaction pathways for NORR, where \* represents the adsorption site.

| Species                          | $E_{ZPE}$ | $TS$ |
|----------------------------------|-----------|------|
| *NO                              | 0.19      | 0.09 |
| *NHO                             | 0.49      | 0.15 |
| *NOH                             | 0.48      | 0.14 |
| *NH <sub>2</sub> O               | 0.81      | 0.19 |
| *NHOH                            | 0.79      | 0.17 |
| *NH <sub>2</sub> OH              | 1.12      | 0.22 |
| *NH                              | 0.34      | 0.07 |
| *NH <sub>2</sub>                 | 0.67      | 0.11 |
| *NH <sub>3</sub>                 | 1.04      | 0.14 |
| *N <sub>2</sub> O <sub>2</sub>   | 0.38      | 0.24 |
| *N <sub>2</sub> O <sub>2</sub> H | 0.68      | 0.27 |
| *N <sub>2</sub> O                | 0.31      | 0.21 |
| *NO                              | 0.19      | 0.09 |
| *NHO                             | 0.49      | 0.15 |
| *NOH                             | 0.48      | 0.14 |
| *NH <sub>2</sub> O               | 0.81      | 0.19 |
| N <sub>2</sub> O                 | 0.29      | 0.68 |
| NH <sub>3</sub>                  | 0.89      | 0.60 |
| N <sub>2</sub>                   | 0.15      | 0.59 |
| H <sub>2</sub>                   | 0.27      | 0.40 |
| H <sub>2</sub> O                 | 0.56      | 0.67 |

**Table S2.** Key parameters of the studied Fe-SACs, including spin magnetic moment ( $M$ , in  $\mu_B$ ), net charge ( $Q$ , in  $e$ ), the positive value means the electrons are transferred from the Fe atom to supports, and the  $d$ -band center ( $\varepsilon_d$ , in eV) of the Fe atom.

| Systems                               | $M$  | $Q$  | $\varepsilon_d$ |
|---------------------------------------|------|------|-----------------|
| PD-N <sub>4</sub>                     | 1.94 | 1.40 | -1.39           |
| PD-N <sub>3</sub> C                   | 2.16 | 1.38 | -1.08           |
| PD-N <sub>2</sub> C <sub>2</sub> -I   | 2.48 | 1.32 | -1.06           |
| PD-N <sub>2</sub> C <sub>2</sub> -II  | 2.57 | 1.37 | -0.95           |
| PD-N <sub>2</sub> C <sub>2</sub> -III | 2.32 | 1.35 | -0.90           |
| PD-NC <sub>3</sub>                    | 2.62 | 1.31 | -1.24           |
| PD-C <sub>4</sub>                     | 2.72 | 1.29 | -1.29           |
| PD-N <sub>3</sub> O                   | 1.81 | 1.42 | -1.32           |
| PD-N <sub>2</sub> O <sub>2</sub> -I   | 1.77 | 1.53 | -1.30           |
| PD-N <sub>2</sub> O <sub>2</sub> -II  | 1.35 | 1.33 | -1.12           |
| PD-N <sub>2</sub> O <sub>2</sub> -III | 3.48 | 1.18 | -1.28           |
| PD-NO <sub>3</sub>                    | 3.50 | 1.17 | -1.19           |
| PD-O <sub>4</sub>                     | 3.46 | 1.38 | -1.14           |
| PR-N <sub>4</sub>                     | 1.96 | 1.34 | -1.46           |
| PR-N <sub>3</sub> C                   | 2.23 | 1.25 | -1.36           |
| PR-N <sub>2</sub> C <sub>2</sub> -I   | 2.68 | 1.19 | -1.21           |
| PR-N <sub>2</sub> C <sub>2</sub> -II  | 2.62 | 1.45 | -1.13           |
| PR-N <sub>2</sub> C <sub>2</sub> -III | 2.57 | 1.38 | -1.26           |
| PR-NC <sub>3</sub>                    | 2.67 | 1.35 | -1.13           |
| PR-C <sub>4</sub>                     | 2.82 | 1.44 | -1.06           |
| PR-N <sub>3</sub> O                   | 3.46 | 1.42 | -1.36           |
| PR-N <sub>2</sub> O <sub>2</sub> -I   | 3.39 | 1.35 | -1.16           |
| PR-N <sub>2</sub> O <sub>2</sub> -III | 3.41 | 1.40 | -1.20           |
| PR-N <sub>2</sub> O <sub>2</sub> -III | 3.46 | 1.35 | -1.24           |
| PR-NO <sub>3</sub>                    | 3.35 | 1.39 | -1.11           |
| PR-O <sub>4</sub>                     | 3.41 | 1.44 | -1.28           |

**Table S3.** N-O bond length of \*NO ( $d_{\text{N-O}}$ , in Å) and the number of electrons transferred from the SACs to \*NO on the studied Fe-SACs ( $\Delta Q(*\text{NO})$ , in  $e$ ).

| Systems                               | $d_{\text{N-O}}$ | $\Delta Q(*\text{NO})$ |
|---------------------------------------|------------------|------------------------|
| PD-N <sub>4</sub>                     | 1.22             | 0.53                   |
| PD-N <sub>3</sub> C                   | 1.20             | 0.62                   |
| PD-N <sub>2</sub> C <sub>2</sub> -I   | 1.21             | 0.64                   |
| PD-N <sub>2</sub> C <sub>2</sub> -II  | 1.20             | 0.63                   |
| PD-N <sub>2</sub> C <sub>2</sub> -III | 1.21             | 0.65                   |
| PD-NC <sub>3</sub>                    | 1.21             | 0.61                   |
| PD-C <sub>4</sub>                     | 1.21             | 0.56                   |
| PD-N <sub>3</sub> O                   | 1.22             | 0.54                   |
| PD-N <sub>2</sub> O <sub>2</sub> -I   | 1.23             | 0.56                   |
| PD-N <sub>2</sub> O <sub>2</sub> -II  | 1.21             | 0.57                   |
| PD-N <sub>2</sub> O <sub>2</sub> -III | 1.22             | 0.57                   |
| PD-NO <sub>3</sub>                    | 1.20             | 0.64                   |
| PD-O <sub>4</sub>                     | 1.19             | 0.63                   |
| PR-N <sub>4</sub>                     | 1.19             | 0.29                   |
| PR-N <sub>3</sub> C                   | 1.20             | 0.37                   |
| PR-N <sub>2</sub> C <sub>2</sub> -I   | 1.19             | 0.35                   |
| PR-N <sub>2</sub> C <sub>2</sub> -II  | 1.20             | 0.41                   |
| PR-N <sub>2</sub> C <sub>2</sub> -III | 1.19             | 0.54                   |
| PR-NC <sub>3</sub>                    | 1.20             | 0.53                   |
| PR-C <sub>4</sub>                     | 1.20             | 0.57                   |
| PR-N <sub>3</sub> O                   | 1.21             | 0.36                   |
| PR-N <sub>2</sub> O <sub>2</sub> -I   | 1.21             | 0.53                   |
| PR-N <sub>2</sub> O <sub>2</sub> -III | 1.20             | 0.39                   |
| PR-N <sub>2</sub> O <sub>2</sub> -III | 1.20             | 0.36                   |
| PR-NO <sub>3</sub>                    | 1.20             | 0.45                   |
| PR-O <sub>4</sub>                     | 1.19             | 0.46                   |
